# Supplementary material for: Transcriptional and Non-Transcriptional Functions of PPARβ/δ in Non-Small Cell Lung Cancer
Source: PubMed Central journal article supplement (PMC3457940; doi:10.1371/journal.pone.0046009), 2012-09-25
Supplement: pone.0046009.s001.pdf [file pone.0046009.s001.pdf]

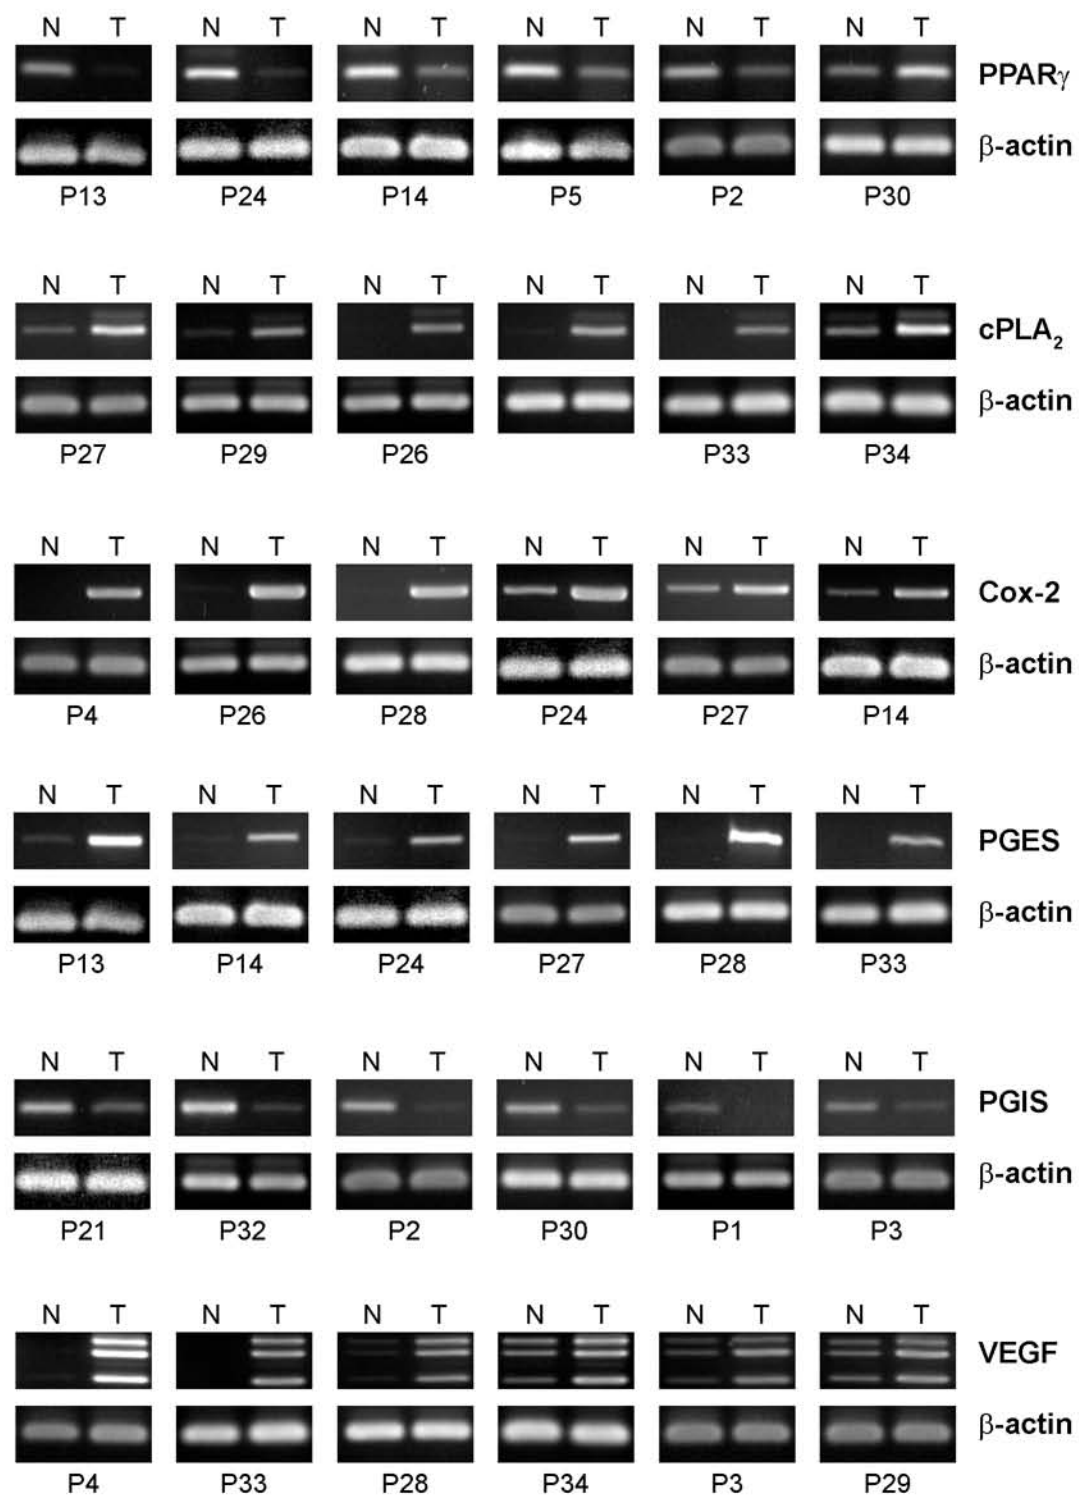

Figure S1. Expression of PPAR $\gamma$ , cPLA $_2$ , Cox-2, VEGF, PGIS, and PGES in non-small cell lung cancers and adjacent normal tissue. RNA was extracted from tumors and adjacent normal lung tissue from patients with non-small cell lung cancer and examined by RT-PCR with gene specific primers.  $\beta$ -actin was used as reference gene. Representative gel images are shown.
