# Supplementary material for: Transcriptional and Non-Transcriptional Functions of PPARβ/δ in Non-Small Cell Lung Cancer
Source: PubMed Central journal article supplement (PMC3457940; doi:10.1371/journal.pone.0046009), 2012-09-25
Supplement: pone.0046009.s002.pdf [file pone.0046009.s002.pdf]

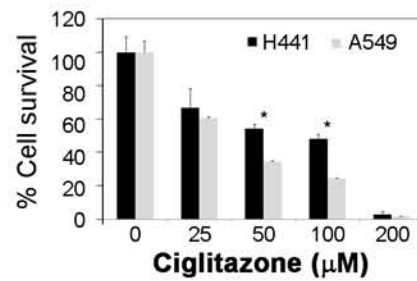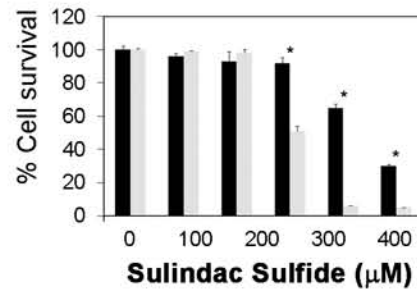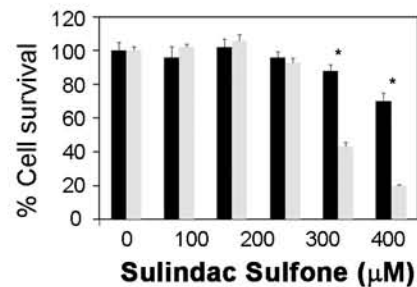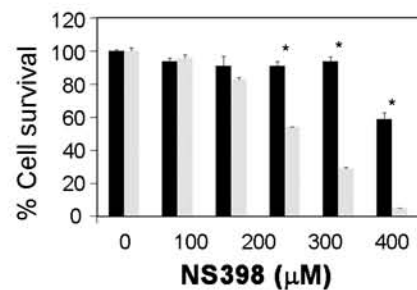

Figure S2. Effects of ciglitazone, sulindac sulfide, sulindac sulfone, and NS398 on growth of H441 and A549 cells. H441 and A549 cells were plated in 96-well plates and after 24 h incubated with the indicated compounds. Cell viability was assessed after 72 h with MTT assay. \*P<0.01
