# Supplementary material for: Transcriptional and Non-Transcriptional Functions of PPARβ/δ in Non-Small Cell Lung Cancer
Source: PubMed Central journal article supplement (PMC3457940; doi:10.1371/journal.pone.0046009), 2012-09-25
Supplement: pone.0046009.s003.pdf [file pone.0046009.s003.pdf]

**Table S1.** Sequences of PCR primers and siRNAs

| Gene                    |         | Sequence                             |
|-------------------------|---------|--------------------------------------|
| <b>Primers (RT-PCR)</b> |         |                                      |
| β-Actin                 | Forward | 5'-AAGAGAGGCATCCTCACCCCT-3'          |
|                         | Reverse | 5'-TACATGGCTGGGGTGTTGAA-3'           |
| ADRP                    | Forward | 5'-CCTTGGTGAGCTCCACGTAT-3'           |
|                         | Reverse | 5'-CTTCTCCACACTGCCAGTCA-3'           |
| Cox-2                   | Forward | 5'-TGTGGGGCAGGAGGTCTTGGTCT-3'        |
|                         | Reverse | 5'-GCATCTGGCCGAGGCTTTTCTAC-3'        |
| cPLA <sub>2</sub>       | Forward | 5'-CCAAAGTGACAAAGGGGGCC-3'           |
|                         | Reverse | 5'-GCTACCACAGGCACATCACG-3'           |
| GAPDH                   | Forward | 5'- GGCTGTGGGCAAGGTCATCCCTGA-3'      |
|                         | Reverse | 5'- TCCACCACCCTGTTGCTGTA-3'          |
| ILK                     | Forward | 5'-GTACCTGACCTGCCCACACT-3'           |
|                         | Reverse | 5'- TCTCGAACCTTCAGCACCTTCACGACAA -3' |
| PDK                     | Forward | 5'-TTCGTCCTCCTCCTCACACT-3'           |
|                         | Reverse | 5'-GCCTCTGGTCGAAGTTCTTG-3'           |
| PPAR $\delta$           | Forward | 5'-GGCCTTCTCCAAGCACATCTA-3'          |
|                         | Reverse | 5'-TGCGCAGGAACTCACGGGTGA-3'          |
| VEGF                    | Forward | 5'-ATGAACTTTCTGCTGTCTTGGGTGCATT-3'   |
|                         | Reverse | 5'-TCACCGCCTCGGCTTGTACAT-3'          |
| VEGFR1                  | Forward | 5'-CAAGTGGCCAGAGGCATGGAGTT-3'        |
|                         | Reverse | 5'-CTGTGCCAGCAGTCCAGCAT-3'           |
| VEGFR2                  | Forward | 5'-GAGGGCCACTCATGGTGATTGT-3'         |
|                         | Reverse | 5'-CGTGCCAGCAGTCCAGCAT-3'            |
| <b>Primers (ChIP)</b>   |         |                                      |
| -527/-298               | Forward | 5'-AGAGTGAGGACGTGTGTGTCTGT-3'        |
|                         | Reverse | 5'-GAGCAGGAAAGTGAGGTTACGTG-3'        |
| -1338/-1123             | Forward | 5'-AAGGATAGGGGAGAAGCTGTGAG-3'        |
|                         | Reverse | 5'-CTGCGTGATGATTCAAACCTACC-3'        |
| <b>siRNA</b>            |         |                                      |
| PPAR $\delta$           | Forward | 5'-GGCCUUCUCCAAGCACAUctt-3'          |
|                         | Reverse | 5'-GAUGUGCUUGGAGAAGGCCtt-3'          |
| GL3                     | Forward | 5'- CUUACGCUGAGUACUUCGAtt -3'        |
|                         | Reverse | 5'- UCGAAGUACUCAGCGUAAGtt -3'        |
