# Supplementary material for: Transcriptional and Non-Transcriptional Functions of PPARβ/δ in Non-Small Cell Lung Cancer
Source: PubMed Central journal article supplement (PMC3457940; doi:10.1371/journal.pone.0046009), 2012-09-25
Supplement: pone.0046009.s004.pdf [file pone.0046009.s004.pdf]

**Table S2.** Correlation analysis of PPAR $\beta/\delta$ , VEGF and Cox-2 expression in human lung cancer microarray datasets

| Lung Cancer Dataset | Number of samples | Gene  | Pearson R | Pearson p-value |
|---------------------|-------------------|-------|-----------|-----------------|
| Rohrbeck            | 47                | VEGFA | 0.59      | 1.3E-05         |
|                     |                   | Cox-2 | 0.50      | 3.7E-04         |
| Garber              | 73                | VEGFA | 0.44      | 1.1E-04         |
|                     |                   | Cox-2 | nc        | ns              |
| Hou                 | 156               | VEGFA | 0.26      | 0.001           |
|                     |                   | Cox-2 | 0.25      | 0.001           |
| DirectorsChallenge  | 443               | VEGFA | 0.25      | 8.7E-08         |
|                     |                   | Cox-2 | nc        | ns              |

Genome-wide transcriptome datasets from four independent studies (PMID: 18992152, 11707590, 20421987, 18641660) including human lung cancer and normal lung samples were downloaded and normalized gene expression values for PPAR $\beta/\delta$ , VEGF and Cox-2 were used for correlation analysis. Pearson correlation coefficient and corresponding p-values of VEGFA and COX-2 expression with respect to PPAR $\beta/\delta$  were calculated for the samples in each dataset. *nc*, no correlation. *ns*, non significant.
